# Supplementary material for: Epidemiological Characteristics and Spatiotemporal Trend Analysis of Human Brucellosis in China, 1950–2018
Source: PubMed Central journal article supplement (PMC7178157; doi:10.3390/ijerph17072382), 2020-03-31
Supplement: ijerph-17-02382-s001.pdf [file ijerph-17-02382-s001.pdf]

Table S1 . Time series predictions of human brucellosis in the months of 2019-2020

| Year | Month | Point forecast | Low 80   | High 80  | Low 95   | High 95  |
|------|-------|----------------|----------|----------|----------|----------|
| 2019 | Jan   | 1902.133       | 1469.304 | 2412.001 | 1269.247 | 2715.203 |
| 2019 | Feb   | 1965.608       | 1463.486 | 2570.381 | 1236.031 | 2935.274 |
| 2019 | Mar   | 3648.835       | 2846.250 | 4588.659 | 2473.312 | 5145.349 |
| 2019 | Apr   | 3824.242       | 2933.482 | 4877.997 | 2523.331 | 5506.383 |
| 2019 | May   | 4770.822       | 3656.139 | 6090.227 | 3143.146 | 6877.322 |
| 2019 | Jun   | 4841.119       | 3654.494 | 6258.529 | 3112.879 | 7109.140 |
| 2019 | Jul   | 4506.417       | 3324.510 | 5937.809 | 2791.827 | 6804.522 |
| 2019 | Aug   | 3941.756       | 2817.720 | 5328.820 | 2319.891 | 6178.806 |
| 2019 | Sep   | 2518.938       | 1666.251 | 3619.904 | 1304.727 | 4313.827 |
| 2019 | Oct   | 1872.948       | 1158.255 | 2831.835 | 866.727  | 3450.281 |
| 2019 | Nov   | 2391.551       | 1513.570 | 3554.212 | 1150.619 | 4298.285 |
| 2019 | Dec   | 2175.229       | 1130.332 | 3315.912 | 987.905  | 4054.320 |
| 2020 | Jan   | 1798.755       | 966.188  | 3005.826 | 653.697  | 3819.641 |
| 2020 | Feb   | 1817.947       | 931.894  | 3134.980 | 608.617  | 4035.158 |
| 2020 | Mar   | 3445.720       | 1984.338 | 584.751  | 1412.566 | 6832.158 |
| 2020 | Apr   | 3629.616       | 2048.453 | 5861.426 | 1437.172 | 7343.710 |
| 2020 | May   | 4536.441       | 2603.456 | 7239.940 | 1848.710 | 9026.168 |
| 2020 | Jun   | 4600.847       | 2580.841 | 7461.563 | 1802.722 | 9365.114 |
| 2020 | Jul   | 4280.064       | 2303.775 | 7142.140 | 1561.077 | 9070.578 |
| 2020 | Aug   | 3735.306       | 1894.760 | 6486.297 | 1227.525 | 8372.225 |
| 2020 | Sep   | 2365.392       | 1020.626 | 4549.233 | 580.023  | 6112.846 |
| 2020 | Oct   | 1747.015       | 653.932  | 3649.391 | 327.461  | 5058.846 |
| 2020 | Nov   | 2243.356       | 893.190  | 4524.487 | 473.207  | 6190.348 |
| 2020 | Dec   | 2036.143       | 757.289  | 4268.615 | 376.956  | 5925.078 |

Low80-High80 represents 80% confidence interval; Low95-High95 represents 95% confidence interval

Table S2. Per capita GDP distribution of each province in mainland China, 2004-2018 (by three years) (/ 100 million yuan)

| districts      | 2004-2006 | 2007-2009 | 2010-2012 | 2013-2015 | 2016-2018 | Over all  |
|----------------|-----------|-----------|-----------|-----------|-----------|-----------|
| Beijing        | 21120.51  | 33114.84  | 48244.91  | 64146.23  | 84004.05  | 250630.54 |
| Tianjin        | 11479.35  | 19493.62  | 33425.62  | 46707.13  | 55244.22  | 166349.94 |
| Hebei          | 29957.34  | 46854.77  | 71485.03  | 87670.21  | 102097.04 | 338064.39 |
| Shanxi         | 12680.51  | 20698.16  | 32551.24  | 38193.23  | 45396.94  | 149520.08 |
| Inner Mongolia | 11890.35  | 24659.63  | 41912.46  | 52518.2   | 51513.53  | 182494.17 |
| Liaoning       | 24023.78  | 40045.37  | 65530.4   | 84508.82  | 70971.49  | 285079.86 |
| Jilin          | 11017.4   | 18989.54  | 31175.65  | 40912.67  | 44795.95  | 146891.21 |
| Heilongjiang   | 16476.1   | 24005.37  | 36642.18  | 44577.96  | 47650.39  | 169352    |
| Shanghai       | 27892.73  | 41610.32  | 56543.39  | 70509.3   | 91491.51  | 288047.25 |
| Jiangsu        | 55344.34  | 91457.76  | 144593.97 | 194958.07 | 255853.44 | 742207.58 |
| Zhejiang       | 40784.85  | 63206.77  | 94706.49  | 120816.11 | 155216.77 | 474730.99 |
| Anhui          | 16221.97  | 26275.4   | 44872.03  | 62083.72  | 81432.44  | 230885.56 |
| Fujian         | 19901.89  | 32308.07  | 51999.08  | 71904.07  | 96796.71  | 272909.82 |
| Jiangxi        | 12333.99  | 20426.48  | 34102.96  | 46848.6   | 60490.09  | 174202.12 |
| Shandong       | 55288.9   | 90606.84  | 134545.01 | 177659.24 | 217128.31 | 675228.3  |
| Henan          | 31504     | 52511.45  | 79622.7   | 104131.7  | 133080.48 | 400850.33 |
| Hubei          | 19840.9   | 33623.42  | 57850.32  | 81721.24  | 107510.02 | 300545.9  |
| Hunan          | 19926.71  | 34054.29  | 57861.75  | 80561.2   | 101880.11 | 294284.06 |
| Guangdong      | 68009.75  | 108056.28 | 156291.26 | 203097.19 | 267837.91 | 803292.39 |
| Guangxi        | 12163.76  | 20603.57  | 34325.82  | 46925.91  | 57193.41  | 171212.47 |

| districts | 2004-2006 | 2007-2009 | 2010-2012 | 2013-2015 | 2016-2018 | Over all  |
|-----------|-----------|-----------|-----------|-----------|-----------|-----------|
| Hainan    | 2804.08   | 4411.44   | 7442.7    | 10381.04  | 13347.79  | 38387.05  |
| Chongqing | 10409.53  | 16999.8   | 29346.55  | 42763.13  | 57528.51  | 157047.52 |
| Sichuan   | 22454.97  | 37314.9   | 62084.96  | 84981.83  | 110592.89 | 317429.55 |
| Guizhou   | 6022.2    | 10358.35  | 17156.2   | 27855.81  | 40124.01  | 101516.57 |
| Yunnan    | 10532.78  | 16634.39  | 26426.77  | 38266.07  | 49045.88  | 140905.89 |
| Tibet     | 759.9     | 1177.64   | 1814.32   | 2762.89   | 3939.96   | 10454.71  |
| Shannxi   | 11852.91  | 21241.67  | 37089.46  | 51917.25  | 65736.72  | 187838.01 |
| Gansu     | 5899.82   | 9258.36   | 14791.32  | 19957.83  | 22906.34  | 72813.67  |
| Qinghai   | 1657.92   | 2897.24   | 4914.41   | 6842.43   | 8062.55   | 24374.55  |
| Ningxia   | 1875.62   | 3476.34   | 6133.15   | 8241.44   | 10317.33  | 30043.88  |
| Xinjiang  | 7858.54   | 11983.42  | 19552.83  | 27042.1   | 32730.74  | 99167.63  |

Continue for table S2.
